# Supplementary material for: Arrayed single-gene perturbations identify drivers of human anterior neural tube closure
Source: eLife. 2026 Jul 7;14:RP108224. doi: 10.7554/eLife.108224 (PMC13341112; doi:10.7554/eLife.108224)
Supplement: Figure 3—source data 1. [file elife-108224-fig3-data1.xlsx]

## Sheet: gRNA
Target Gene	Guide RNA 1	Guide RNA 2
ARX	GCTTGTCCTGAGCGCGGAGA	GATGCTGTCGATGCAGTAGG
ATOH7	GCCGCTCAGGACCTGCGCGT	GTGCTCAGAAGAGGCACGTT
BARHL1	GGAGCTCCCGGGCTCCCCCA	GTCTAATGCGCAGAGGAGGT
CSRNP3	GTCGCTCTTACCTGTAAATA	GAAATATGGTTTCTGTACTT
DNMT1	GGTACGCGCCGGCATCTCGG	GGAGGCTTCAGCAGACGCGG
DNMT3B	GGCCGGTCCCGTCCGTCGGG	GCCACTCCCGCTGCCCCGTC
EMX2	GTAAGTCCAAGGACAATCCA	GGCAGGGCGCCCTAAGTCCA
ETV6	GCGGCTGCCGGGAGAGATGC	GGAGAGCGAGGGAGAGCCGC
FEZF1	GCAAGCAGGGAACAAGGCAA	GCAGGGAACAAGGCAACGGA
FEZF2	GCAGGCGCGGGGGAACACAG	GCCCCTCAAACTTTAAAAGG
GLI3	GGAGAGCGGCGCGGGTGAGT	GGAGCGGGACGTACCTGCGG
GLIS3	GGATGTGTGTGCGGCCGCGA	GCAGTGTGGACGCGGCTGCA
GSC	GACTGCTGGGCGCCCAGCGG	GGGCTAAGGACCGCAGTGGG
HES4	GGAGCCGGGATCCGCCCTAG	GGCGATCCGAGCCCCTAGGG
HES5	GTGGCGCGGAACAGGCGACG	GAACAGGCGACGAGGCGACG
HESX1	GGCTGGGAGACATCCTCTCG	GGCTCTGTGCAGACCACGAG
ID3	GTGGTACCCGGAGTCCCGAG	GGCGTTGCAGGTCACTGTAG
KAT6A	GCCTGGCGCAGAGCAGCGGG	GAAGGACAGCCGAGATCCCG
KMT2A	GGTGAAGTGAAGCAGCGAGA	GCCCGACCCGGGACCACCGG
LHX2	GGCCACCGGGAGAATTGAAG	GAGCCCAAGGCGACCCTCTT
LHX5	GCCGGACCGCTTGAAAGTGG	GTGGCCTCGGCGCTGCGGAG
MAF	GGAAGTCCTGGGGAAAGACG	GACTCTTCTTGCTGGATCAG
MAFB	GAGGCAGCCTCGGGACTCTC	GTGCACCGCCGAGCTGCGAG
MECOM	GACACCTCGCCCAAAAAAAG	GAGGCGGAGAAAGGGAGCCG
MEIS3	GGAGAGGTGTGAGGGTCTAA	GGACCTCAGGACTCCAAGAG
MSX1	GGGGAACTCTGCCTGCGCGG	GAGTTCCCGGGAGCACTCGC
MYBL2	GGGCCCCGGGCCGCGCTCGA	GTCCTGCGAGCGAGGAGCGC
NFATC4	GTAACGAGGGGGCTTCTGGA	GAGTTTCTATAATAACGAGG
NR2F1	GGAATGGAGTAAAAGAGACA	GTTGAATGCGTTTAAACGGG
NR2F2	GAGCGGCTCCGGGCCCGACC	GATCCTTCGTGCGCAGAGGG
NR6A1	GGGCGTGTGACGTCAGGGGA	GCCCGGCCGCGGCTCTCTCT
NSD2	GCTGTGGGAGGCCTGAGGGG	GGGCGGGCGGCTCTCCGGAG
OTX1	GGCGTTCACATACCCGGGGA	GCCCGGGGAGGGCAGTAGAA
OTX2	GATCTCCCTGAGAGCGGGAC	GATCACAGTGGAGGCTGTGT
PAX3	GAGAGAGCCACGGCGAGCCG	GCACTCGGTGTCACCACAGG
PAX6	GAGTGAGAGATAAAGAGTGT	GATGTTGCGGAGTGATTAGT
PAX7	GGGCTGGACGGAGGAGACAG	GGAGCCCGGAGACTGCGGAG
PBX3	GCGGGATGGACGATCAATCC	GTGGCCAGCCAGGTTCACCC
PLAGL1	GCGGGTGCTGGACGGACGGA	GAGCACCCGCCCGGAGAGTG
POU3F1	GGCCCGCAGACGGAGCGGAG	GACCTGCCGCGGGGCCCCGG
POU3F2	GTCACCGCGCTGTCCCACGG	GTGGCAGCGCCGGCTCGCAG
RAX	GCCGACTTCTGGGACTAAGG	GCCCGGGCTGCGCACGCTGG
RCOR2	GTCGCCACTGAGGTTAGGAG	GTGTGTGCGCGAGGAGCGAG
RFX3	GGAACAGAGCCCCTCGGCGG	GGAGAGGGAGACACTCGCAC
RFX7	GACATCACCGGGGAGACCAG	GCCCGGCAGTAGAAAGCCCC
RORB	GTGTTCAGTTACAGGGAGGA	GACATTGTGGATCCGCTAAC
SALL2	GCACCCAGCGGCCCAGACTG	GCGGAGATGGAGATCGGCAG
SALL3	GGGATGCGCGCGTCCGGGAG	GGGGCGCAGGCAGCAAACTT
SALL4	GGTGGAACCAATTAAGTGAG	GACGTACGCGGGATCCTCGA
SIX3	GGCGATGAGGACCAGGAGGA	GTCGCTGAATCTTGACTCGG
SIX6	GGAGCCCGAACCCCAAGCCG	GGGACGACCCCGACTGGAGG
SMAD2	GGGGTCTACCCGCGCGGCCG	GCTGCCGCCCAGGCTGACGG
SOX11	GAGCCCGGGACCCCTCTCTC	GTGCGGTAGGAGCCACGAGC
SOX12	GGCGCGAGGGCCAAGCGGGA	GACCATCGCGCCTGGGCCCG
SOX2	GACAGCCCCCGTCACATGGA	GCTCAGTCCTAGTCTTAAAG
SOX21	GTGCTGCCAAGTGCCAAAGG	GGGCACTTGGCAGCACGCGG
SOX3	GGCAGCGGTGGTGCGAGCGG	GCAAATCAGCAGGAACCCGC
SOX5	GAGACTGGTCAAGGAGTCCT	GCCCTTTAAGAGACTGGTCA
SP5	GGCGCGGCGAGGGGCAAGGG	GTCAGGGCCGAGCCCGGAGG
SSRP1	GAACGAGCAGCGGAACCCCA	GGCCACCGGAAGCCGTACAC
TCF12	GCCCCCCGAATAGAACTTGT	GACCCACAAGTTCTATTCGG
TFDP2	GAGGCATGCTTCCTTAGACC	GATCTCTCTTACCTGGTCTA
TGIF1	GGAGCAGGAGCAGGGAACAA	GGCAGGGCCAGTAGAGTTCG
TLX2	GCCCTCTCCACCCGGGACTT	GCCGCTGCCCAAGTCCCGGG
TOX3	GCTCAGTCCGCCCGGGGAGG	GCTCCTCAGTCCGCCCGGGG
TSHZ2	GACACACACAAGACAGGGCG	GATCAGGTCGCGGGGAGAGG
VEZF1	GCAGCGGCGGCTCCTCAACA	GGGAGGCGACAACAAAGCGG
VSX1	GATAGCATGGGATCATGCTC	GGAGAGAAGATCCGAGCCCT
VSX2	GGAGCATTAGACACCGGAGG	GGCTCCAGAGCATTAGACAC
ZBTB16	GTCCTCTTCAGGGCACGGTC	GAGGGCACGGTCGGGGTGAG
ZEB1	GCGCCCGGTCCCTAGCAACA	GGGCCGGAACCTTGTTGCTA
ZEB2	GTCCAGGAAACACAAACCTG	GGAAGCGAAGAAACAGCTCC
ZFHX4	GGGCATGGAGCGGTCCTCGG	GAGCAGGAGCGAGCGAGGTA
ZFP90	GGCGTTAGGGACCCTTGCGA	GCCTCCCTCGGCCCTCGCAA
ZIC2	GGCGGCCGGGCGCGTAGCGA	GGCGTAGCGAAGGCGCGGAG
ZIC5	GGCTACACCACCACCAACAG	GGTGGTGGTGTAGCCCGAGA
ZNF219	GGGACCCCGGGAGCCGCGAG	GGAGAGCTGGGGGGCCCCAA
ZNF280A	GGGAGTGGGACCTTCTGATC	GAAGCAGTGCTGCCGGTCTC
ZNF521	GATCAGGATGGCTCCAGAGG	GGTACAGAGCGAGTCCCTGC
PAX2	GCAACCCGGAGGAGCCCCAG	GTTGCGGCTGCGAGAAGACT
PTN	GTCCCTGCGGAGCAAGAAAA	GGACTCAATTACGCCCTGAC
GNG4	GAGGCTTCCGAGGCGTCCCT	GCGGCGAGGCCCCCACTCCG
FRRS1L	GAGGAAGGAGAGATCGGTGC	GAGGAGAGATCGGTGCGGGG
CRABP1	GCGGCGGCAGGTACGGACAG	GCGGCAGGTACGGACAGCGG
SORBS2	GGTGAAGAGAGTTAATGTCA	GGATACACTGAGCAATGCTT
TMEM163	GGCGGGGCTGCGGATCCCGG	GATGCCCGCGGCCGGCTCCA
PAX8	GGAAGGGGAGGATTTTGCAA	GTCAGCAGGCCTGGAAATAT
NEGR1	GGAGCACCGCCGCCAGCCAC	GAGAGTGAGCAGCCCTAGCA
ARL4C	GGGACTGTGAGGCTGCCGAG	GGGAGGGCGCCGAACATCTG

## Sheet: gBlock
GCGTCTCTCAGAGCTAAGCACAAGAGTGCATAGCAAGTTGAAATAAGGCTAGTCCGTTTACAACTTGGCCGCTTTAAGGCCGGTCCTAGCAAGGCCAAGTGGCACCCGAGTCGGGTGCTTTTTTTTGGATCCAATTCTACCGATCCGACGCGCCATCTCTAGGCCCGCGCCGGCCCCCTCGCACGGACTTGTGGGAGAAGCTCGGCTACTCCCCTGCCCCGGTTAATTTGCATATAATATTTCCTAGTAACTATAGAGGCTTAATGTGCGATAAAAGACAGATAATCTGTTCTTTTTAATACTAGCTACATTTTACATGATAGGCTTGGATTTCTATAACTTCGTATAGCATACATTATACGAAGTTATAAACAGCACAAAAGGAAACTCACCCTAACT…
